# Supplementary material
Source: PubMed Central journal article supplement (PMC5954353)
Supplement: bm7b01204_si_001.pdf [file bm7b01204_si_001.pdf]

# **Nonswelling thiol-yne crosslinked hydrogel materials as cytocompatible soft tissue scaffolds**

Laura J. Macdougall,<sup>a</sup> Maria M. Pérez-Madrugal,<sup>a</sup> Maria C. Arno,<sup>a</sup> Andrew P. Dove<sup>\*,a</sup>

<sup>a</sup> Department of Chemistry, The University of Warwick, Gibbet Hill Road, Coventry, CV4 7AL (UK)

## **Contents**

|                                                                                       |    |
|---------------------------------------------------------------------------------------|----|
| 1. NMR and SEC analysis of alkyne and thiol PEG .....                                 | 2  |
| a. <sup>1</sup> H NMR spectrum for alkyne and thiol PEG precursors .....              | 3  |
| b. SEC data for alkyne and thiol PEG precursors .....                                 | 7  |
| 2. LCST for Pluronic <sub>3k</sub> (SH) <sub>2</sub> .....                            | 8  |
| 3. Additional hydrogel characterisation data .....                                    | 9  |
| a. Swellable hydrogels compression data .....                                         | 10 |
| b. Thermoresponsive blended hydrogels .....                                           | 10 |
| c. Additional Cryo-SEM images.....                                                    | 11 |
| d. Multiple arm compression stress/strain charts.....                                 | 12 |
| e. Additional 3 <sub>1A</sub> 2P <sub>3S</sub> compression stress/strain charts ..... | 13 |
| f. Additional Mechanical data for nonswellable hydrogels .....                        | 14 |
| g. Additional biocompatible images of the thiol-yne PEG hydrogels.....                | 15 |

## 1. NMR and SEC analysis of alkyne and thiol PEG

The successful incorporation of the alkyne and thiol functionalities into the PEG-base polymers was confirmed by  $^1\text{H}$  NMR spectroscopy and size exclusion chromatography (SEC) (Table S1).

**Table S1.** Additional characterisation data of alkyne and thiol-PEG precursors.

|                                          | End group conv. (%) | $M_n$ NMR (kg/mol) | $M_n$ SEC <sup>c</sup> (kg/mol) | $\bar{D}_M$ <sup>c</sup> |
|------------------------------------------|---------------------|--------------------|---------------------------------|--------------------------|
| PEG <sub>1k</sub> (C≡CH) <sub>3</sub>    | 97                  | 1.2 <sup>a</sup>   | 3.3                             | 1.07                     |
| PEG <sub>2k</sub> (C≡CH) <sub>4</sub>    | 93                  | 2.4 <sup>a</sup>   | 5.9                             | 1.08                     |
| PEG <sub>1k</sub> (SH) <sub>3</sub>      | 96                  | 1.3 <sup>b</sup>   | 1.2 <sup>d</sup>                | 1.08 <sup>d</sup>        |
| PEG <sub>2k</sub> (SH) <sub>4</sub>      | >99                 | 1.9 <sup>b</sup>   | 4.7                             | 1.06                     |
| PEG <sub>1k</sub> (SH) <sub>2</sub>      | 97                  | 1.2 <sup>b</sup>   | 2.7                             | 1.1                      |
| PEG <sub>2k</sub> (SH) <sub>2</sub>      | >99                 | 2.2 <sup>b</sup>   | 2.7 <sup>d</sup>                | 1.26 <sup>d</sup>        |
| PEG <sub>3k</sub> (SH) <sub>2</sub>      | 84                  | 3.3 <sup>b</sup>   | 8.7                             | 1.1                      |
| Pluronic <sub>3k</sub> (SH) <sub>2</sub> | 93                  | 3.2 <sup>b</sup>   | 5.8                             | 1.2                      |

<sup>a</sup>Determined by  $^1\text{H}$  NMR spectroscopy in deuterated acetone. <sup>b</sup>Determined by  $^1\text{H}$  NMR spectroscopy in deuterated chloroform. <sup>c</sup>Determined by SEC analysis in DMF against poly(methyl methacrylate). <sup>d</sup>Determined by SEC analysis in chloroform against polystyrene standards

a.  $^1\text{H}$  NMR spectrum for alkyne and thiol PEG precursors

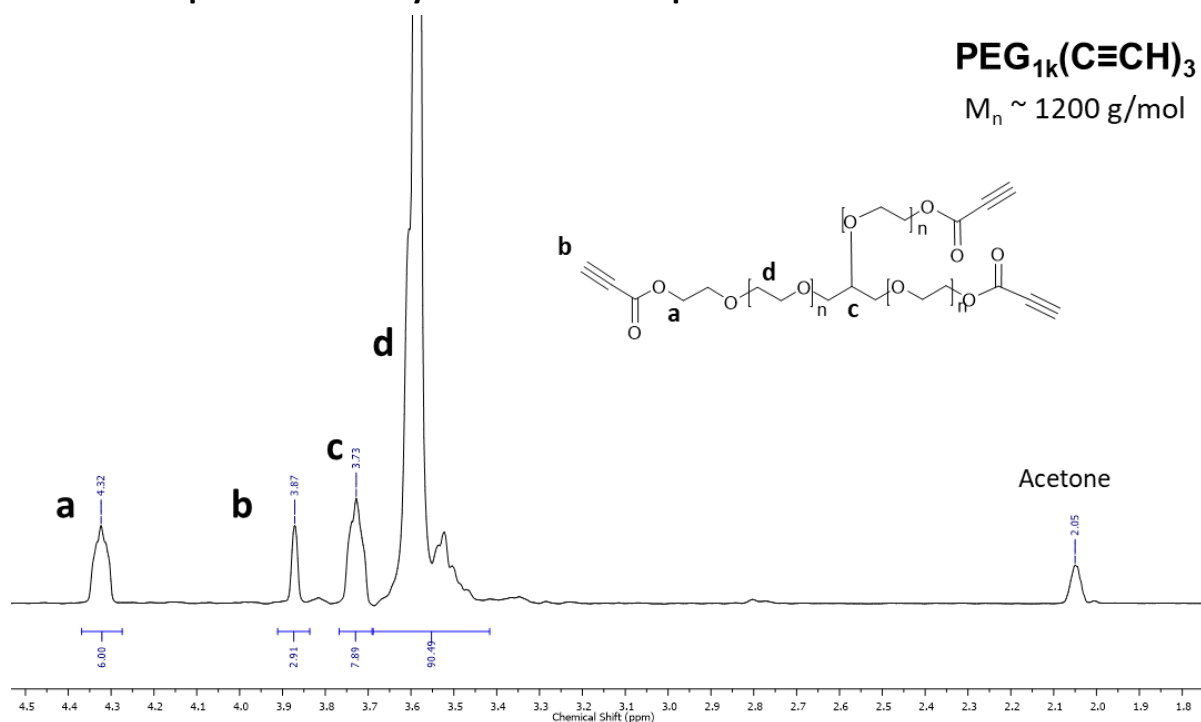

Figure S1.  $^1\text{H}$  NMR spectrum of PEG<sub>1k</sub>(C≡CH)<sub>3</sub> (1 kg/mol) in d<sub>6</sub>-acetone (300 MHz, 298 K).

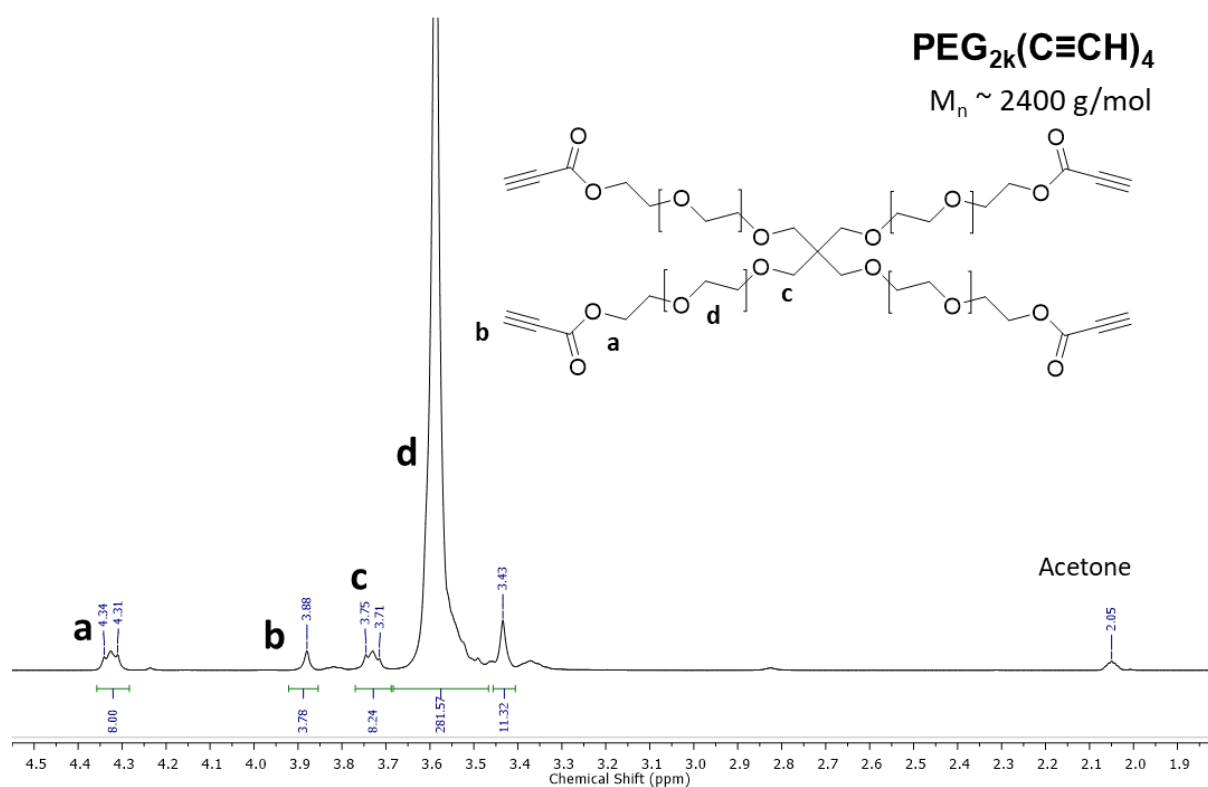

Figure S2.  $^1\text{H}$  NMR spectrum of PEG<sub>2k</sub>(C≡CH)<sub>4</sub> (2 kg/mol) in d<sub>6</sub>-acetone (300 MHz, 298 K).

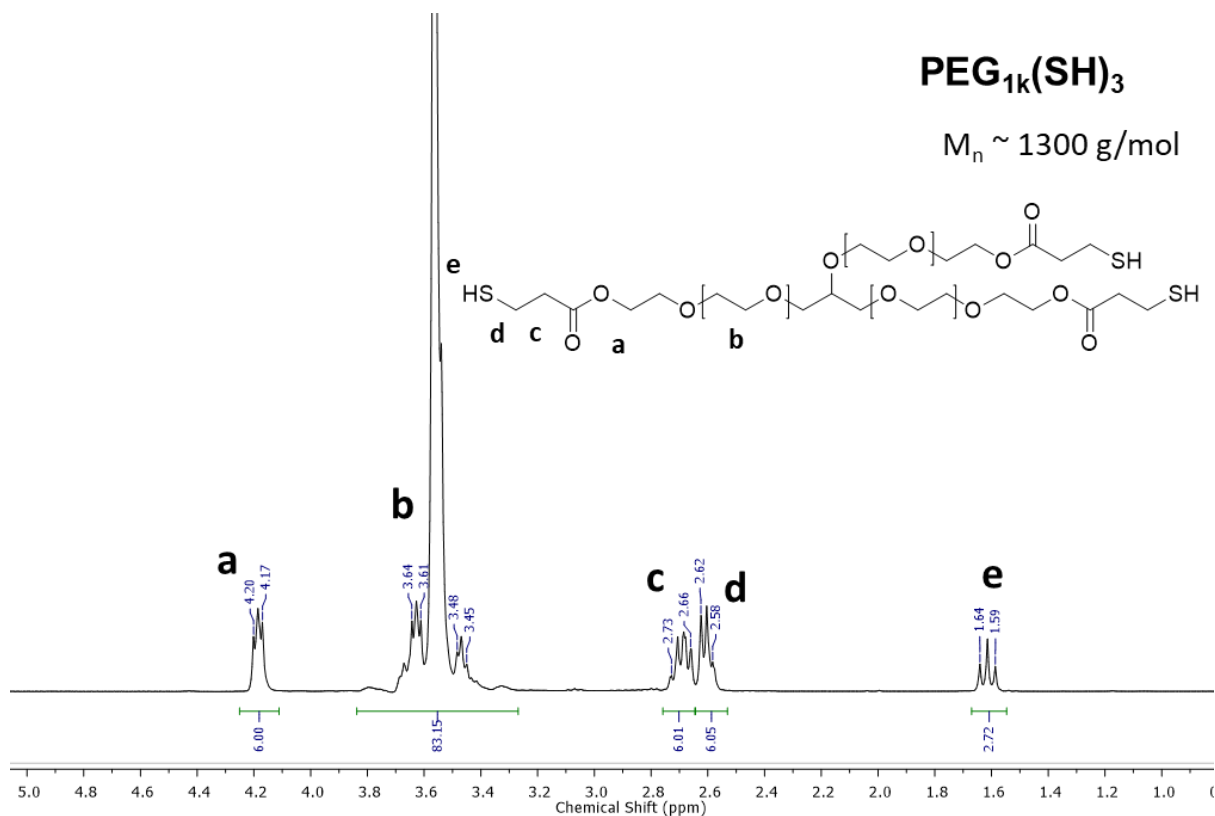

**Figure S3.** <sup>1</sup>H NMR spectrum of PEG<sub>1k</sub>(SH)<sub>3</sub> (1 kg/mol) in CDCl<sub>3</sub> (300 MHz, 298 K).

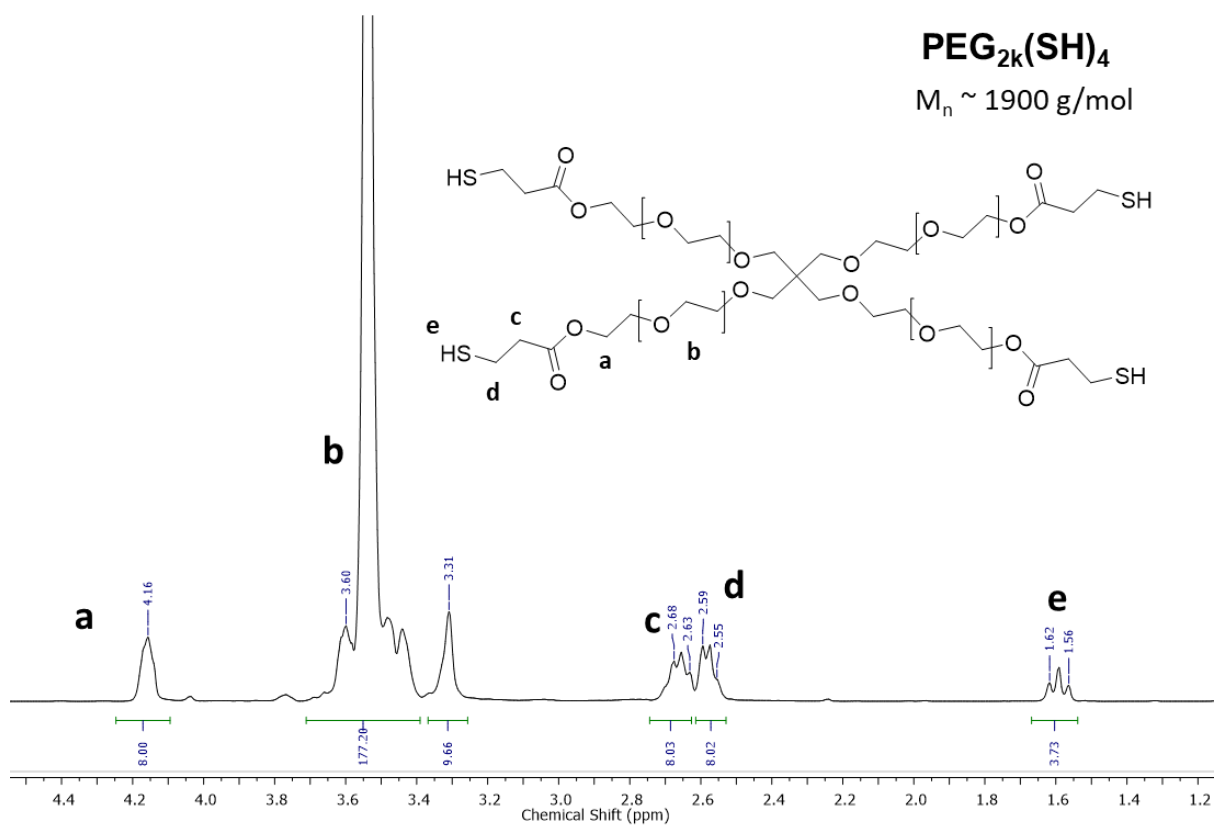

**Figure S4.** <sup>1</sup>H NMR spectrum of PEG<sub>2k</sub>(SH)<sub>4</sub> (2 kg/mol) in CDCl<sub>3</sub> (300 MHz, 298 K).

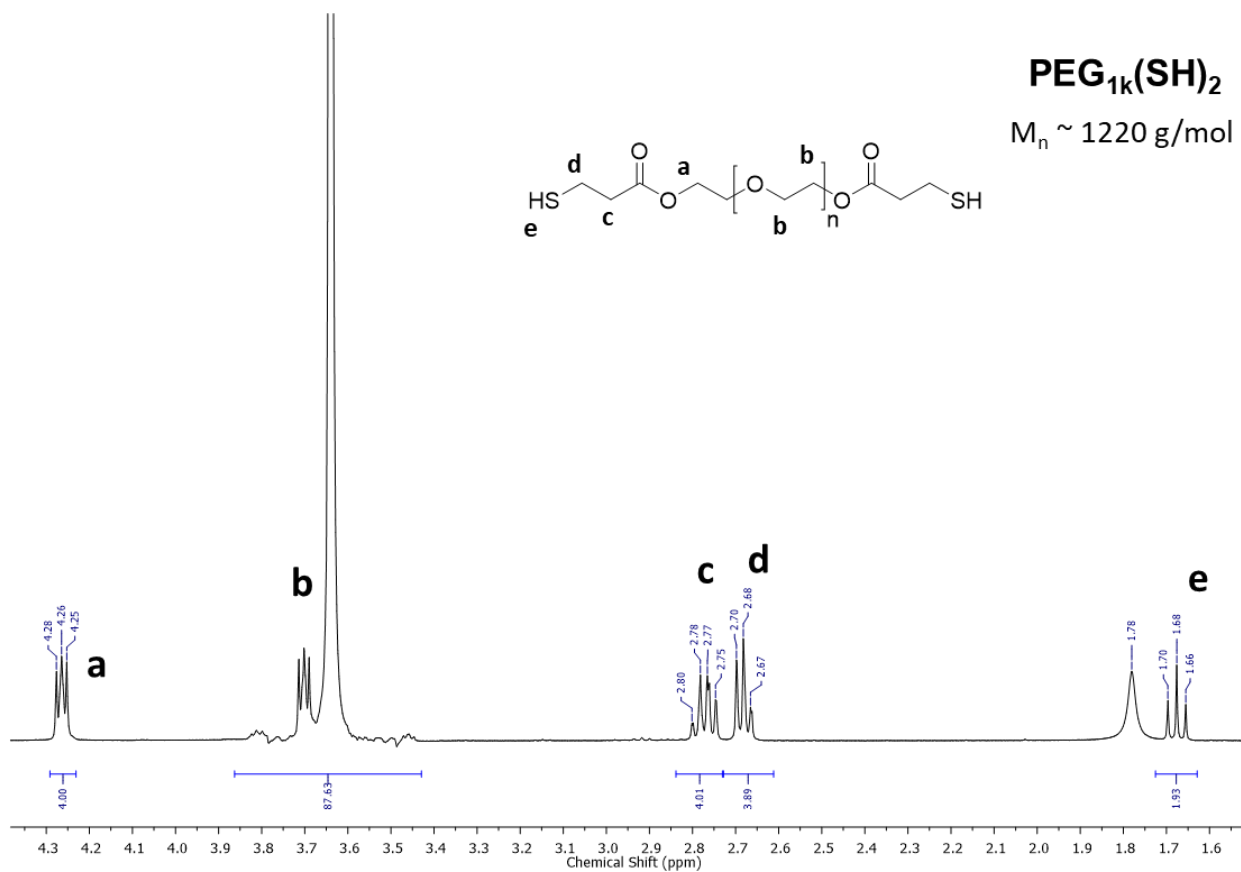

**Figure S5.** <sup>1</sup>H NMR spectrum of PEG<sub>1k</sub>(SH)<sub>2</sub> (1 kg/mol) in CDCl<sub>3</sub> (300 MHz, 298 K).

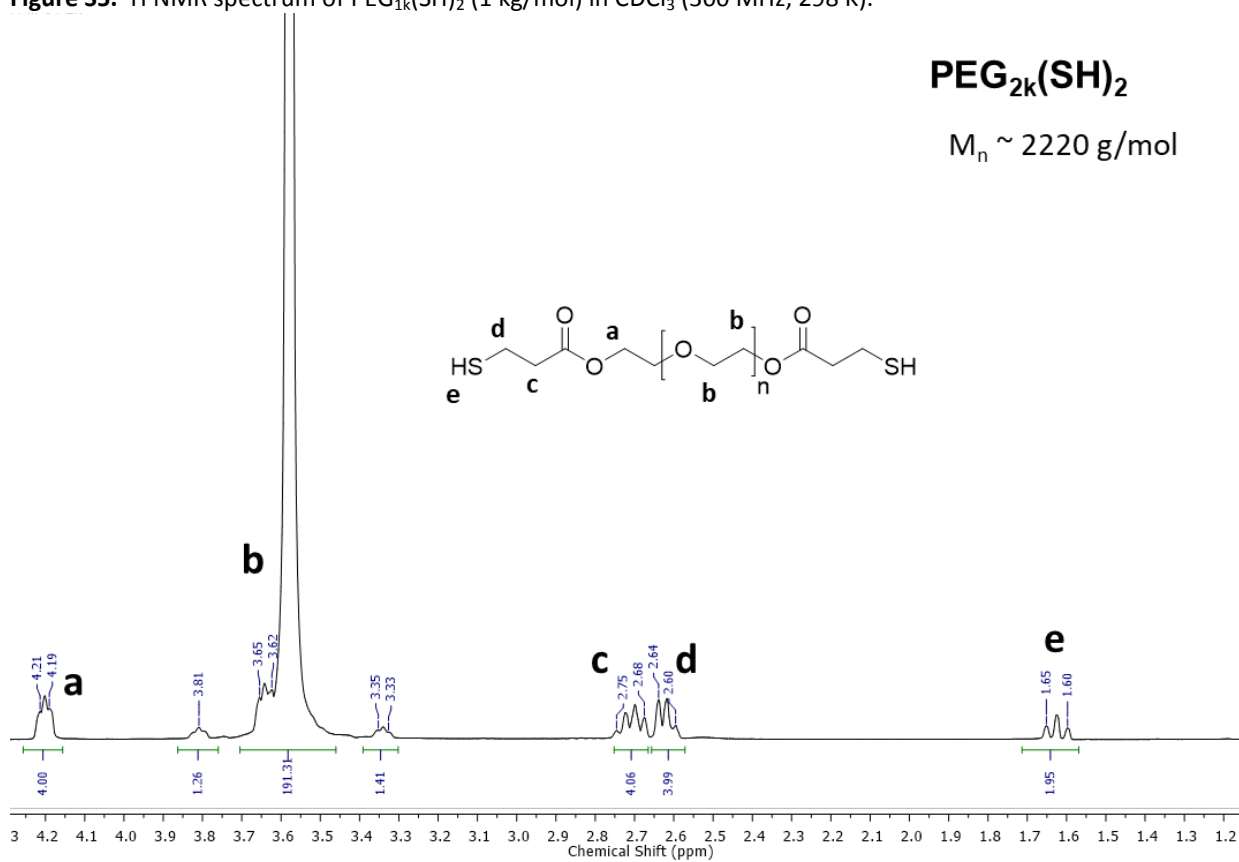

**Figure S6.** <sup>1</sup>H NMR spectrum of PEG<sub>2k</sub>(SH)<sub>2</sub> (2 kg/mol) in CDCl<sub>3</sub> (300 MHz, 298 K).

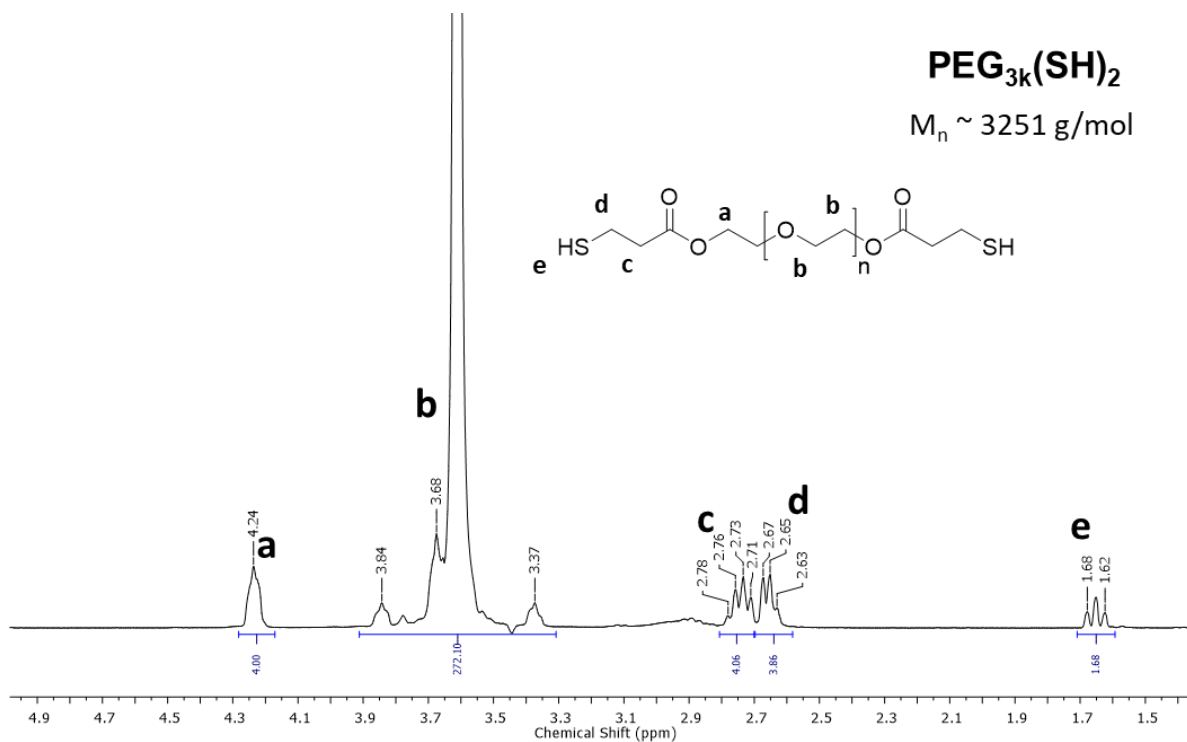

**Figure S7.** <sup>1</sup>H NMR spectrum of PEG<sub>3k</sub>(SH)<sub>2</sub> (3 kg/mol) in CDCl<sub>3</sub> (300 MHz, 298 K).

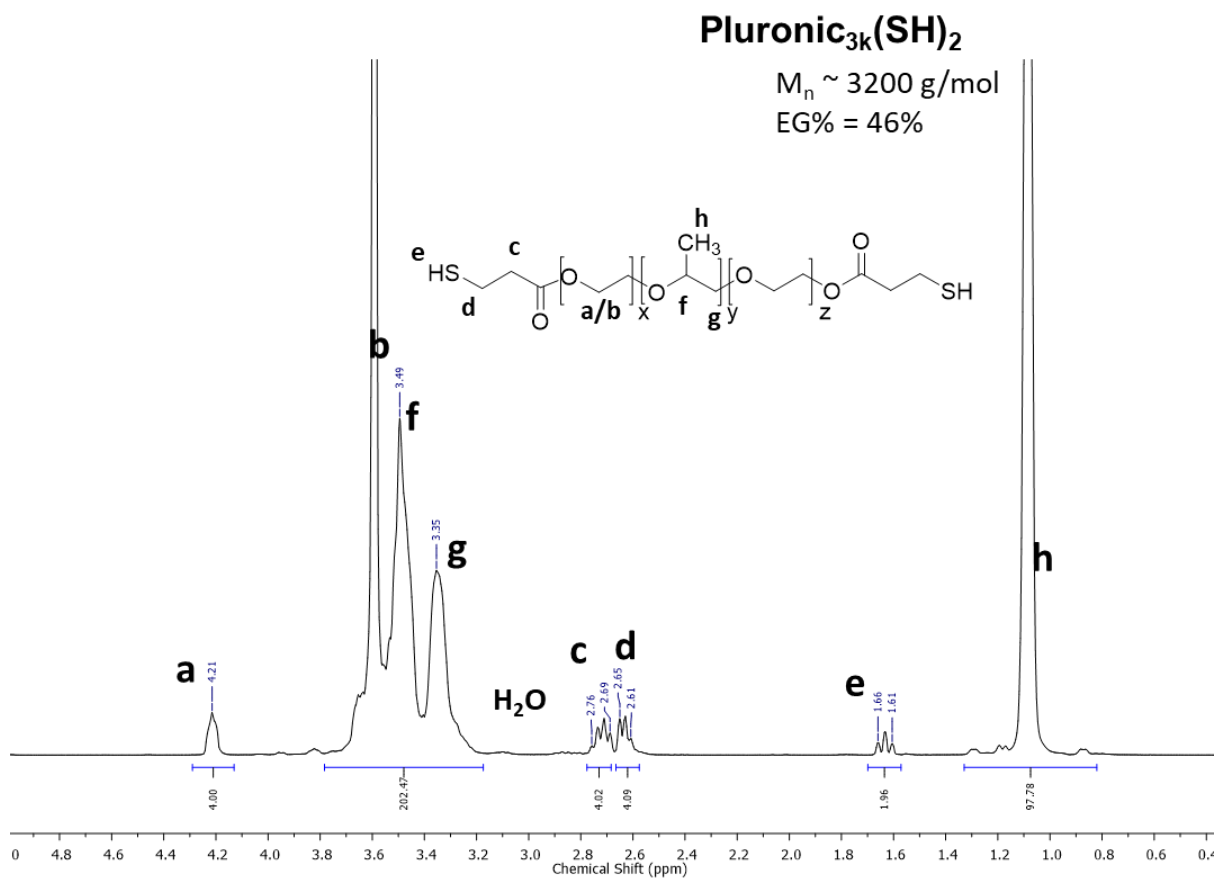

**Figure S8.** <sup>1</sup>H NMR spectrum of Pluronic<sub>3k</sub>(SH)<sub>2</sub> (3 kg/mol) in CDCl<sub>3</sub> (300 MHz, 298 K).

**b. SEC data for alkyne and thiol PEG precursors**

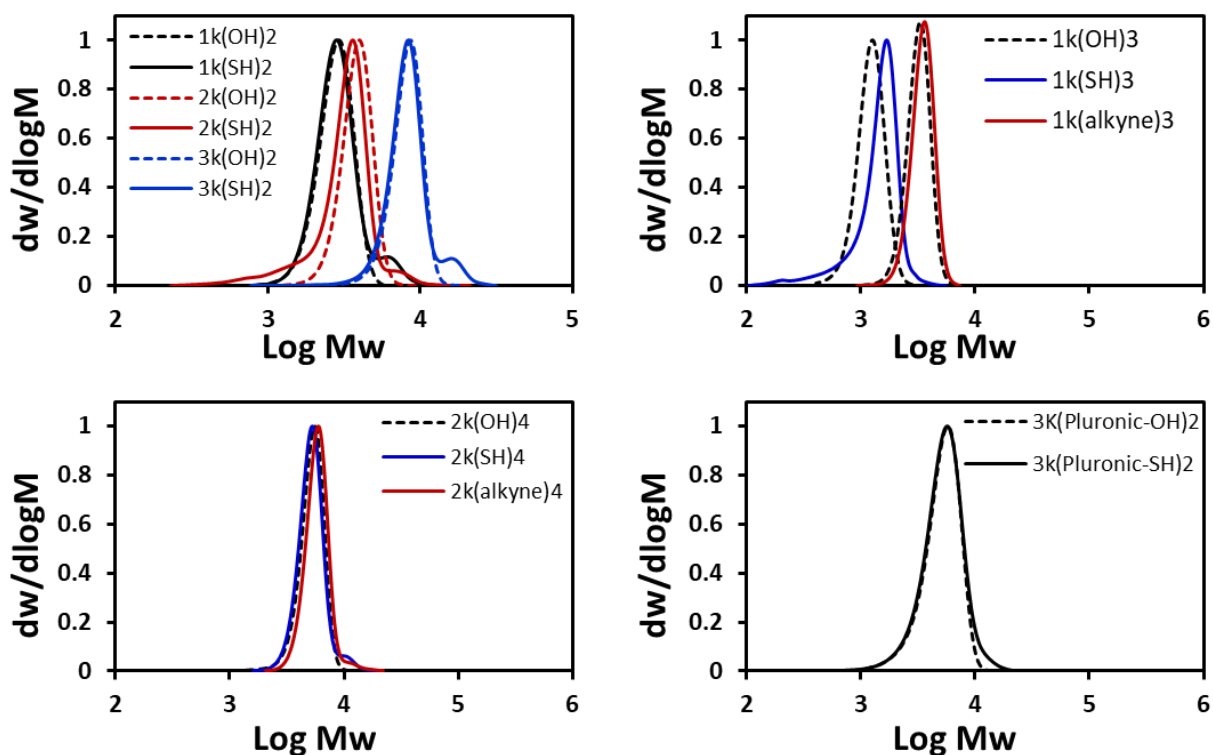

**Figure S9.** SEC chromatograms of alkyne and thiol PEG precursors and starting PEG materials. Molecular weight determined against poly(methyl methacrylate) standards using DMF (5 mM  $\text{NH}_4\text{BF}_4$ ) as eluent or against polystyrene standards using chloroform (0.5%  $\text{NEt}_3$ ), ( $\text{PEG}_{1\text{k}}(\text{SH})_3$  and  $\text{PEG}_{2\text{k}}(\text{SH})_2$ ).

## 2. LCST for Pluronic<sub>3K</sub>(SH)<sub>2</sub>

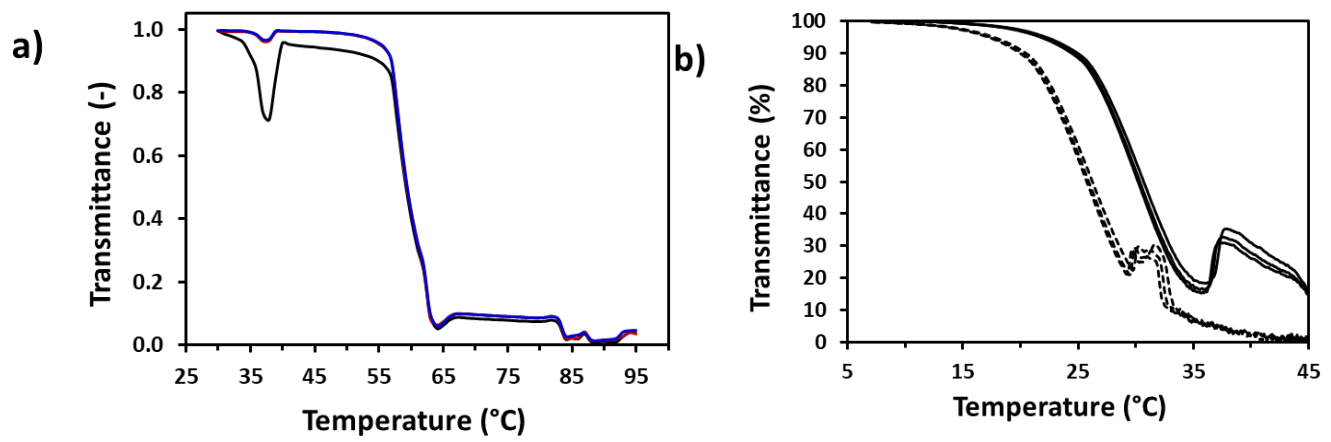

**Figure S10.** LCST response of Pluronic® (a) before and (b) after modification to obtain Pluronic<sub>3K</sub>(SH)<sub>2</sub>.



### 3. Additional hydrogel characterisation data

**Table S2.** Additional mechanical data of gels at 10 w/v% in PBS (1:1 molar ratio of alkyne to thiol end groups): stress and strain values before immersion in PBS /after a certain interval of time at 37 °C.

|                                                       | Stress at break<br>(kPa)       | Strain at break<br>(%)      |
|-------------------------------------------------------|--------------------------------|-----------------------------|
| <b>3<sub>1A</sub>2<sub>1S</sub></b> <sup>a</sup>      | 1944 ± 20 / 1663 ± 80          | 96.3% ± 0.1% / 96.7% ± 0.3% |
| <b>3<sub>1A</sub>2<sub>2S</sub></b> <sup>a</sup>      | 2228 ± 224 / 953 ± 104         | 95.5% ± 0.5% / 97.1% ± 0.3% |
| <b>3<sub>1A</sub>2<sub>3S</sub></b> <sup>a</sup>      | 2357 ± 250 / 1045 ± 52         | 95.4% ± 0.6% / 96.7% ± 0.3% |
| <b>3<sub>1A</sub>2P<sub>3S</sub></b> <sup>b</sup>     | 2469 ± 202 / 4628 ± 252        | 95.3% ± 0.2% / 93.1% ± 0.2% |
| <b>3<sub>1A</sub>2<sub>3S-6040</sub></b> <sup>c</sup> | 2512 ± 55 / 638 ± 249          | 94.8% ± 0.2% / 97.2% ± 0.5% |
| <b>3<sub>1A</sub>3<sub>1S</sub></b>                   | 93 ± 8.8 / 275 ± 37 (3 days)   | 66.4 ± 2.2 / 68.3 ± 3.6     |
| <b>3<sub>1A</sub>4<sub>2S</sub></b>                   | 116 ± 8.7 / 317 ± 77.5 (24hrs) | 61.2 ± 1.89 / 66.4 ± 3.7    |
| <b>4<sub>2A</sub>3<sub>1S</sub></b>                   | 131 ± 10.5 / 315 ± 63 (24 hrs) | 58.0 ± 2.5 / 57.8 ± 4.0     |
| <b>4<sub>2A</sub>4<sub>2S</sub></b>                   | 120 ± 13 / 459 ± 73.5 (5 days) | 48.2 ± 3.7 / 66.7 ± 3.6     |

<sup>a)</sup> After 48h in PBS; <sup>b)</sup> after 7 days in PBS; <sup>c)</sup> after 14 days in PBS; and <sup>d)</sup> maximum stress in PBS at 37 °C.

**Table S3.** Compressive Young's Modulus of gels at 10 w/v% in PBS (1:1 molar ratio of alkyne to thiol end groups) before/after being immersed in PBS at 37 for certain intervals of time. Storage (G') and loss (G'') modulus data obtained from the frequency sweep measurement.

|                                          | Modulus (kPa) |             | G'<br>(kPa) | G''<br>(kPa) |
|------------------------------------------|---------------|-------------|-------------|--------------|
|                                          | As prepared   | 24 hours    |             |              |
| <b>3<sub>1A</sub>2<sub>1S</sub></b>      | 25 ± 2.5      | 11 ± 2.2    | 2154 ± 578  | 40 ± 28      |
| <b>3<sub>1A</sub>2<sub>2S</sub></b>      | 29 ± 1.9      | 4.6 ± 1.0   | 4064 ± 203  | 11 ± 7.3     |
| <b>3<sub>1A</sub>2<sub>3S</sub></b>      | 34 ± 2.6      | 12.4 ± 1.1  | 2304 ± 428  | 42 ± 19      |
| <b>3<sub>1A</sub>2P<sub>3S</sub></b>     | 18 ± 2.2      | 83.7 ± 11.3 | 3356 ± 421  | 340 ± 78     |
| <b>3<sub>1A</sub>2<sub>3S-6040</sub></b> | 24 ± 1.9      | 26.3 ± 1.6  | 3904 ± 570  | 205 ± 50     |
| <b>3<sub>1A</sub>3<sub>1S</sub></b>      | 0.25 ± 0.08   | 0.36 ± 0.14 | 6688 ± 78   | 7.7 ± 5.2    |
| <b>3<sub>1A</sub>4<sub>2S</sub></b>      | 0.44 ± 0.1    | 0.96 ± 0.31 | 124 ± 7.1   | 7.9 ± 3.6    |
| <b>4<sub>2A</sub>3<sub>1S</sub></b>      | 0.67 ± 0.24   | 1.25 ± 0.2  | 1289 ± 127  | 44 ± 12      |
| <b>4<sub>2A</sub>4<sub>2S</sub></b>      | 0.75 ± 0.3    | 2.18 ± 0.47 | 20458 ± 830 | 17.5 ± 4.5   |

### a. Swellable hydrogels compression data

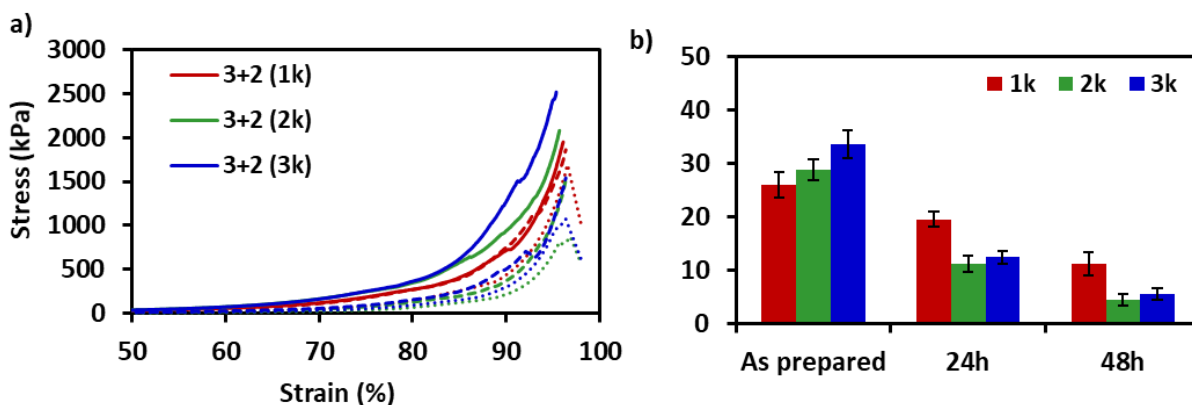

**Figure S11.** (a) Stress/Strain curves for the swellable hydrogels b) Young's Modulus for the swellable hydrogels at 3 time points.

### b. Thermoresponsive blended hydrogels

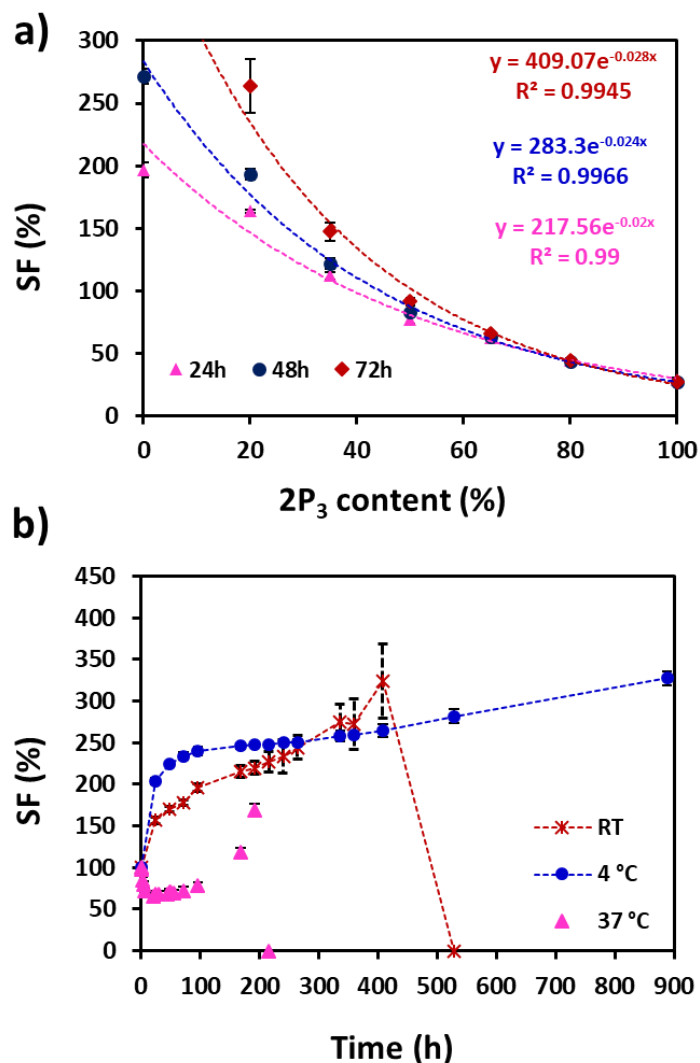

**Figure S12.** Swelling factor (SF) (%) of thermoresponsive blended hydrogels as a function of Pluronic<sub>C<sub>3k</sub></sub>(SH)<sub>2</sub> precursor. b) Swelling response of 3<sub>1A</sub>2<sub>3S-6040</sub> hydrogels in PBS at different temperatures.

### c. Additional Cryo-SEM images

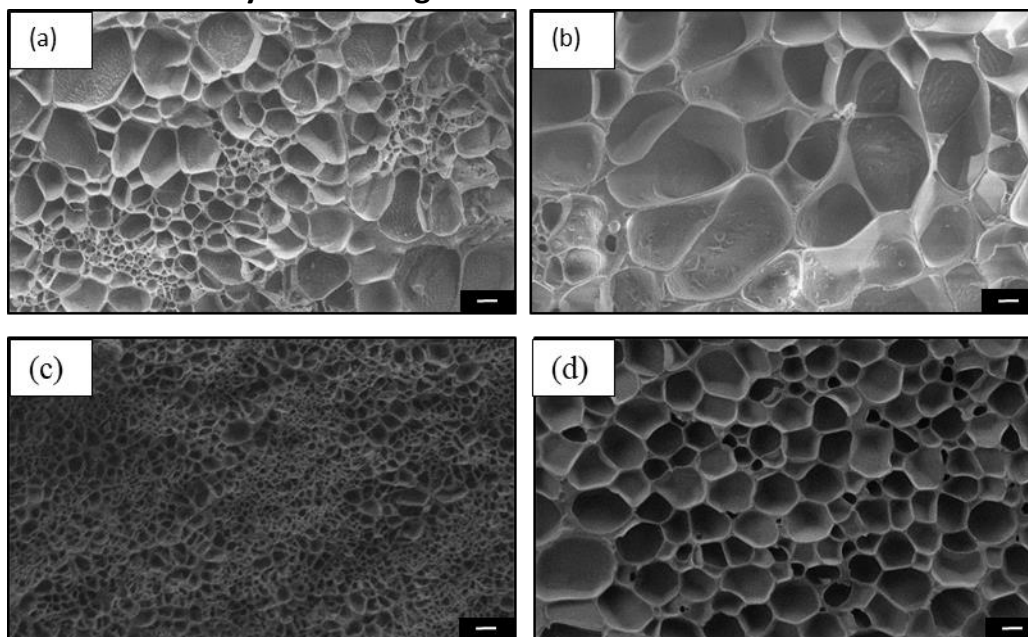

**Figure S13.** Additional cryo-SEM images of nonswellable thiol-yne PEG hydrogels, (Scale bar= 2  $\mu\text{M}$ ): (a) PEG  $4_{2A}4_{2S}$ , (b) PEG  $4_{2A}3_{1S}$ , (c) PEG $3_{1A}4_{2S}$ , (d) PEG $3_{1A}3_{1S}$

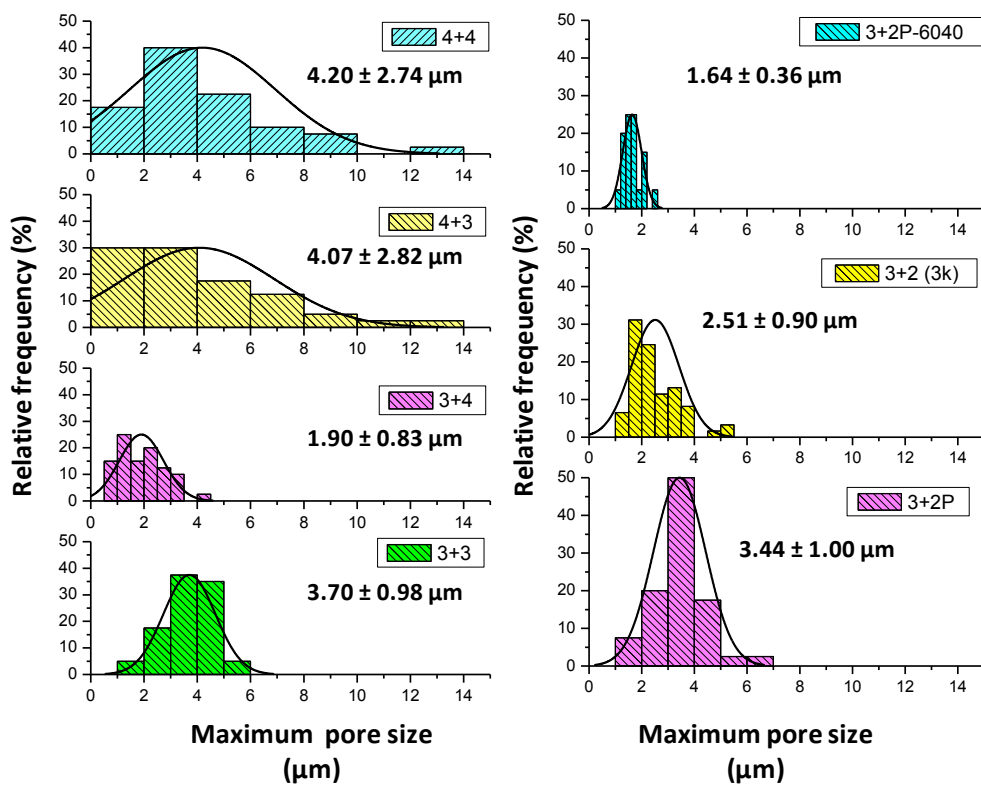

**Figure S14.** Maximum pore size histograms from cryo-SEM images of nonswellable thiol-yne PEG hydrogels. Indicating the maximum size the ice crystals can grow in the hydrogel during the freezing process.

d. Multiple arm compression stress/strain charts

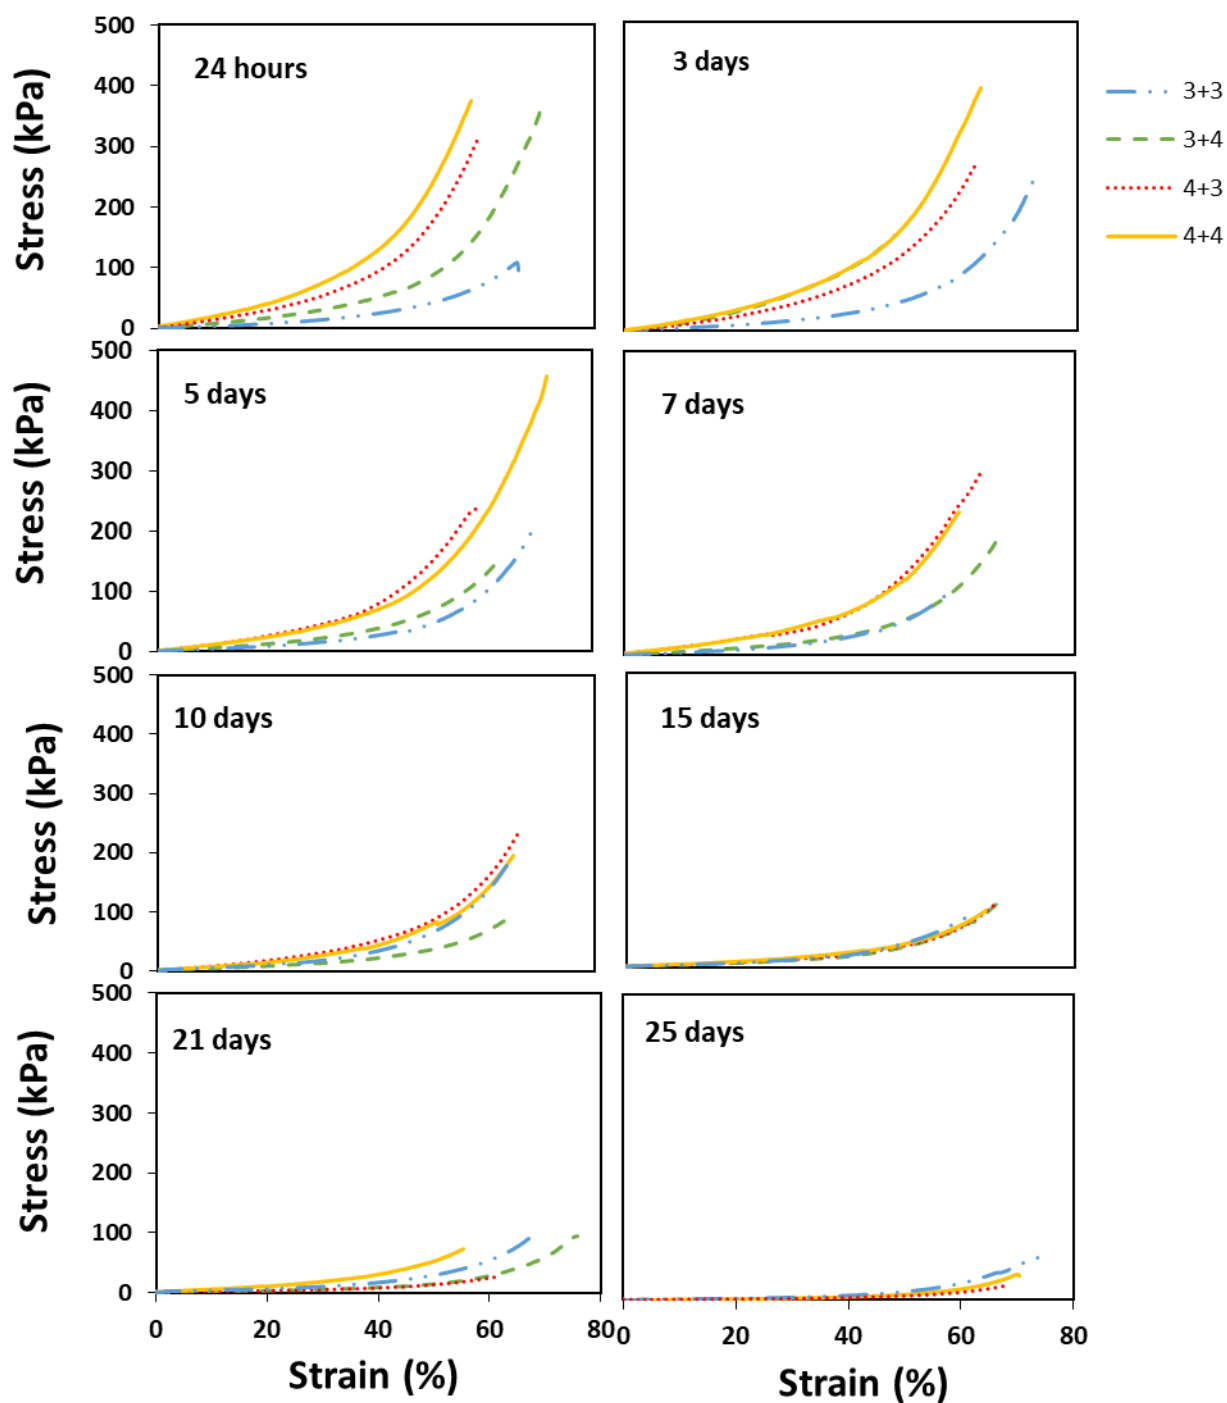

Figure S15. Stress/ strain curves for the hydrogels prepared with multi-arm PEG precursors after being immersed in PBS at 37 °C for different intervals of time.

e. Additional  $3_{1A}2P_{3S}$  compression stress/strain charts

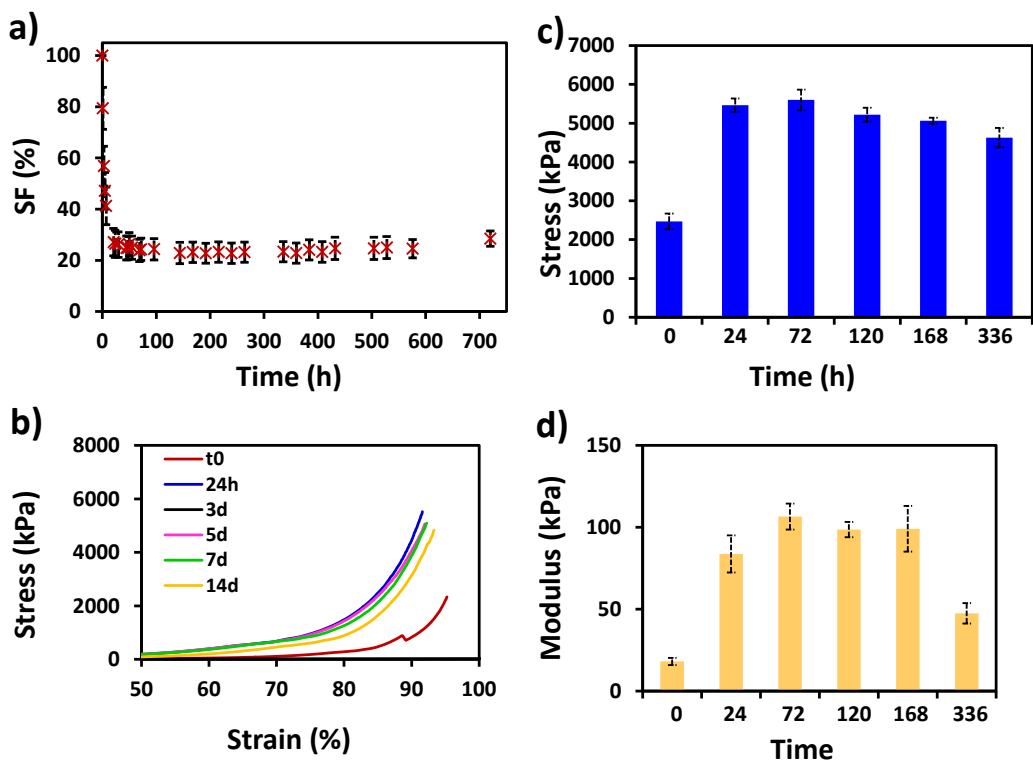

**Figure S16.** Additional mechanical data for  $3_{1A}2P_{3S}$  thermoresponsive nonswellable hydrogel: a) SF (%) as a function of time in PBS at 37 °C; b) compressive stress-strain curves for different intervals of time in PBS at 37 °C; and evolution of compressive strength (c) and Young's Modulus values (d) with immersion time.

f. Additional Mechanical data for nonswellable hydrogels

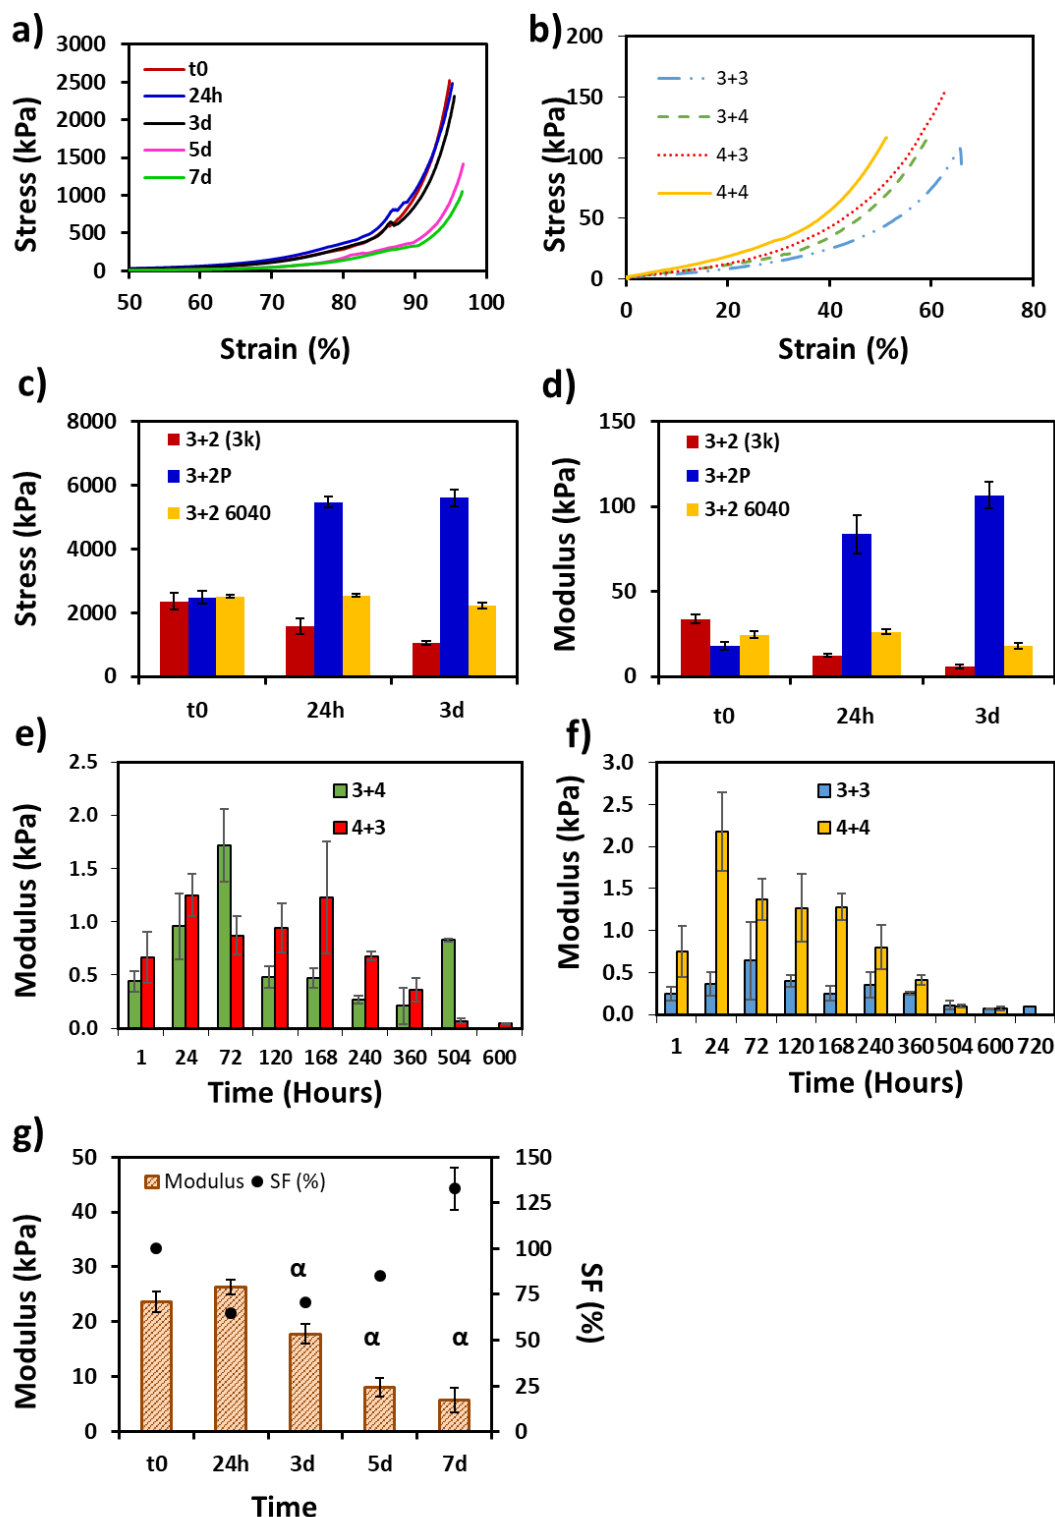

**Figure S17.** Additional mechanical data for nonswellable hydrogels: representative compressive stress-strain curves for a)  $3_{1235-6040}$  hydrogels and b) the multi-arm hydrogels after 1 hour; c) Stress at break and d) Young's Modulus with swelling time for  $3_{1A235}$ ,  $3_{1A2P35}$  and  $3_{1A235-6040}$  hydrogels; and Young's Modulus with swelling time for e)  $4_{2A315}$  and  $3_{1A425}$ ; f)  $4_{2A42A}$  and  $3_{1A315}$ ; and g)  $3_{1A235-6040}$  hydrogels.

g. Additional biocompatible images of the thiol-yne PEG hydrogels

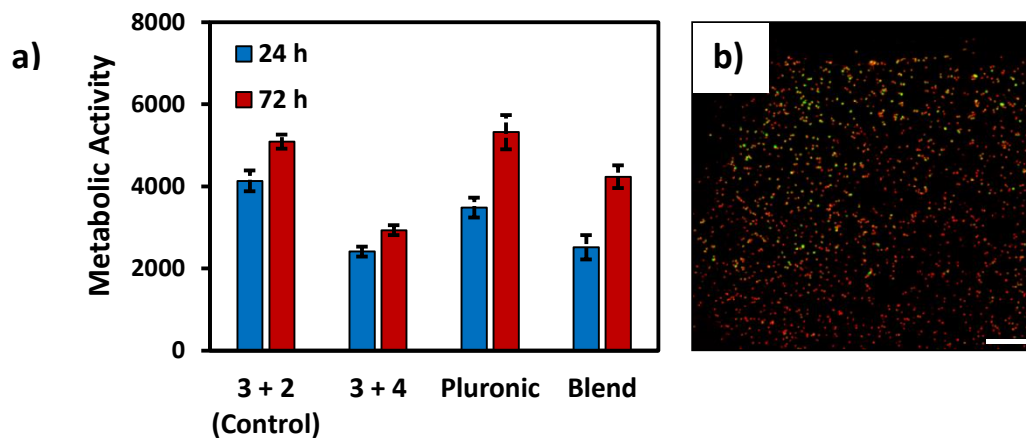

**Figure S18.** a) Metabolic activity of cells seeded on the top of 3+4, Pluronic and Blend hydrogels after 24 and 72 h. b) Fluorescence image of cells stained with live/dead dyes after 72hour encapsulation in Pluronic gels. Scale bar is 200  $\mu$ m.

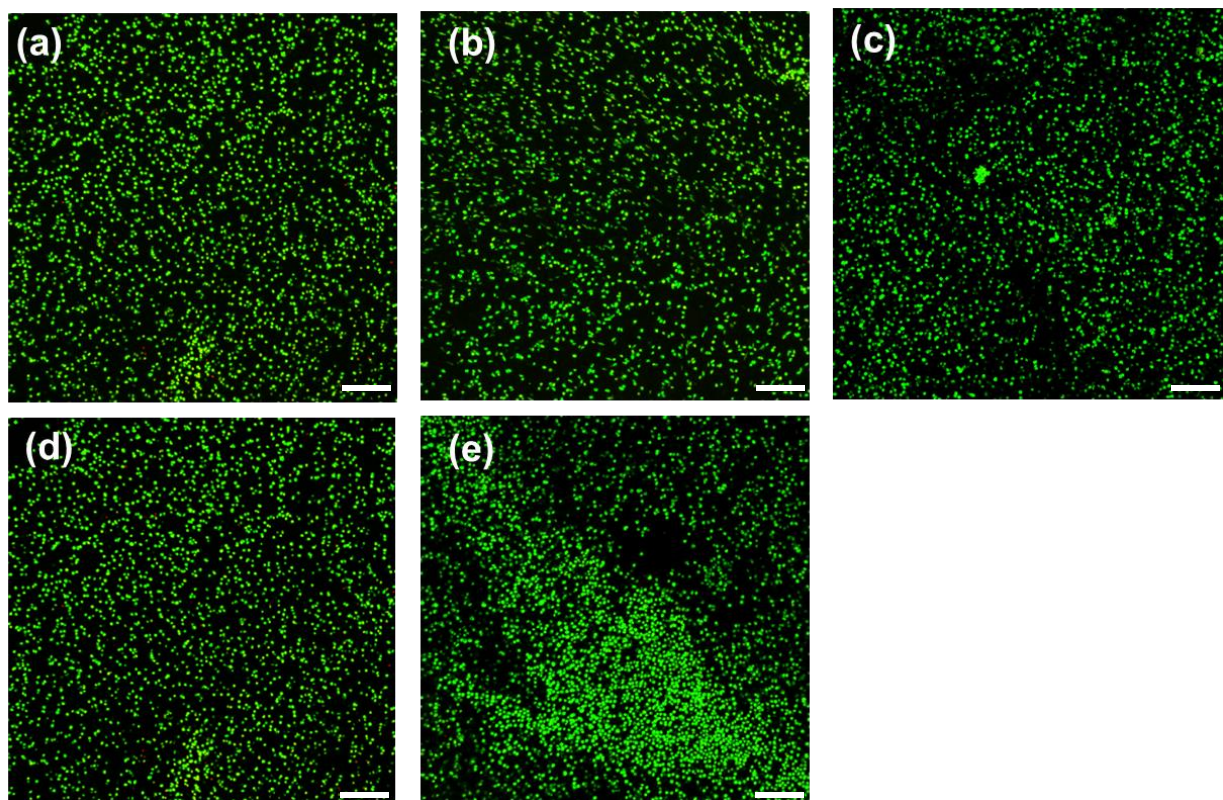

**Figure S19.** 3D encapsulation after 24 hours (a)  $3_{1A}2_{3S}$  at room temperature (b)  $3_{1A}2_{3S}$  prepared in ice (c)  $3_{1A}2_{3S-6040}$  (d)  $3_{1A}2P_{3S}$  (e)  $3_{1A}4_{2S}$ . Scale bar is 200  $\mu$ m.

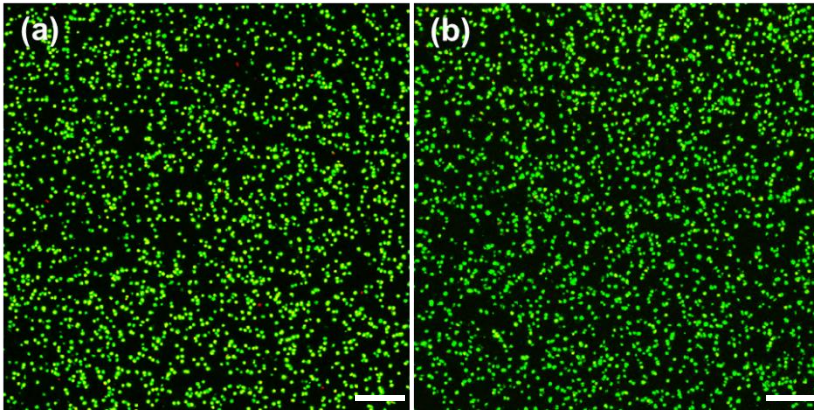

**Figure S20.** 3D encapsulation after 72 hours (a)  $3_{1A}2_{3S}$  at room temperature (b)  $3_{1A}2_{3S}$  prepared in ice. Scale bar is 200  $\mu\text{m}$ .



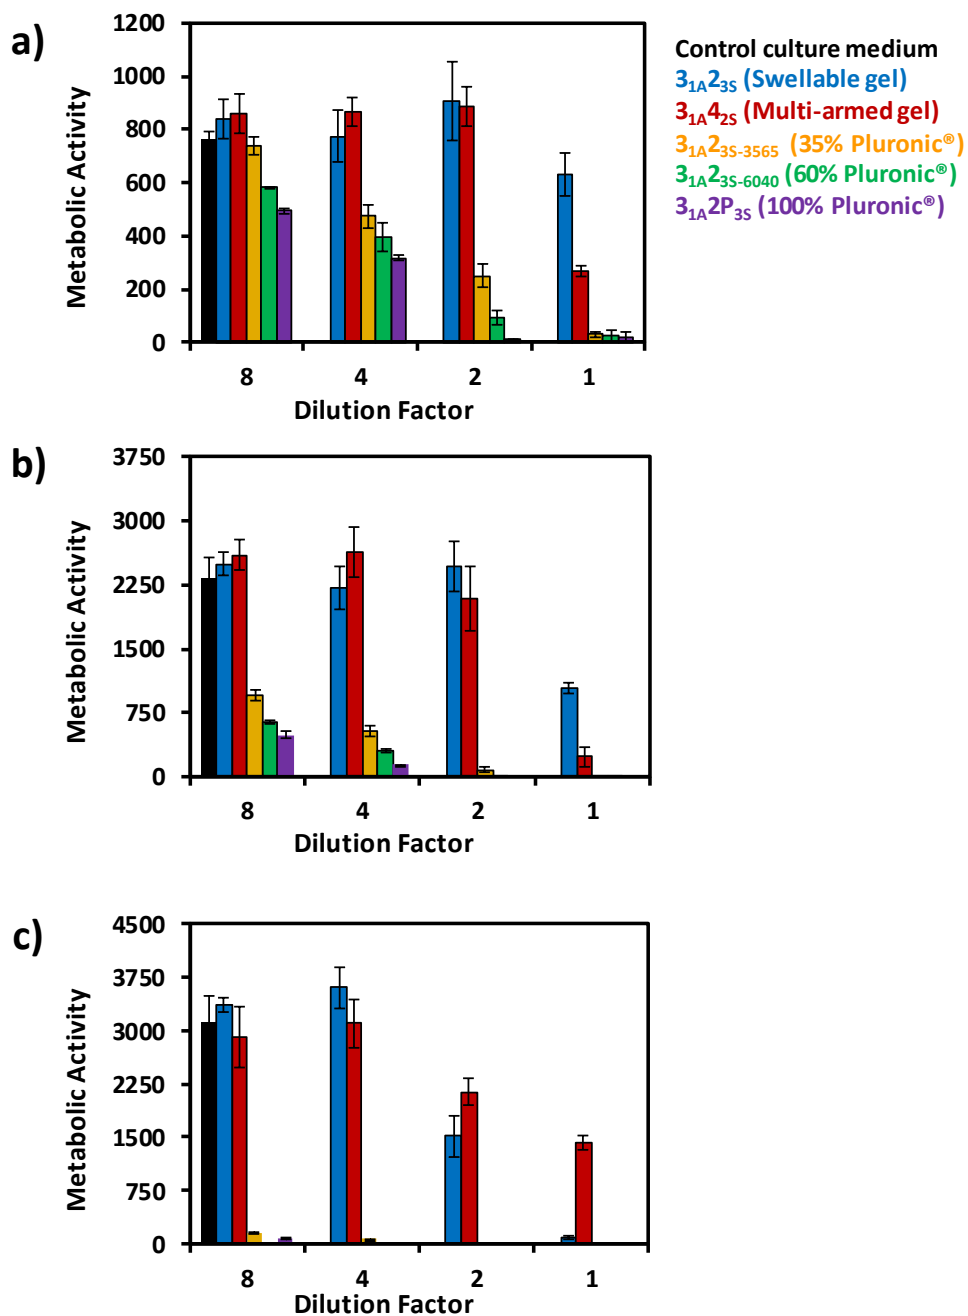

**Figure S21.** Metabolic activity at different time points of cells incubated in the presence of culture medium that had been in contact with gels (DF 1) for 6 days at 37 °C as well as three diluted solutions (DF 2, 4, and 8): (a) 24 h, (b) 72 h, and (c) 7 days. Unaltered culture medium was also used as a control without dilution (black bar at DF 8).
